# Supplementary material for: MicroRNA profiling of novel African American and Caucasian Prostate Cancer cell lines reveals a reciprocal regulatory relationship of miR-152 and DNA methyltranferase 1
Source: PubMed Central journal article supplement (PMC4116499; doi:10.18632/oncotarget.1953), 2014-05-08
Supplement: oncotarget-05-3512-s001.pdf [file oncotarget-05-3512-s001.pdf]

# MicroRNA Profiling of Novel African American and Caucasian Prostate Cancer Cell Lines Reveals a reciprocal regulatory relationship of *miR-152* and DNA methyltransferase-1

## Supplementary Material

**Supplemental Table 1**  
Differentially expressed miRNA's separated by malignancy

| Gene               | (adjusted) p-value ↑ | confidence interval |
|--------------------|----------------------|---------------------|
| hsa-miR-520g_st2   | 0.0069               | (0.113, 0.662)      |
| hsa-miR-582_st2    | 0.0121               | (0.093, 0.705)      |
| hsa-miR-137_st2    | 0.0148               | (0.0776, 0.672)     |
| hsa-miR-501_st2    | 0.0149               | (-0.592, -0.068)    |
| hsa-miR-122a_st2   | 0.0154               | (-1.05, -0.119)     |
| hsa-miR-191_st1    | 0.0171               | (-0.126, -0.0132)   |
| hsa-miR-30a-3p_st2 | 0.0175               | (0.0565, 0.528)     |
| hsa-miR-452_st2    | 0.0185               | (0.0749, 0.756)     |
| hsa-miR-422a_st2   | 0.0249               | (-0.174, -0.0125)   |
| hsa-miR-612_st2    | 0.0263               | (0.0179, 0.268)     |
| hsa-miR-424_st2    | 0.0297               | (0.0467, 0.832)     |
| hsa-miR-452-_st2   | 0.0299               | (0.0646, 1.16)      |
| hsa-miR-154_st2    | 0.0306               | (0.0521, 0.972)     |
| hsa-miR-99a_st1    | 0.0309               | (-0.248, -0.0127)   |
| hsa-miR-224_st1    | 0.032                | (0.0481, 0.971)     |
| hsa-miR-519a_st2   | 0.033                | (0.0389, 0.86)      |
| hsa-miR-455_st2    | 0.035                | (0.0493, 1.25)      |
| hsa-miR-153_st1    | 0.0379               | (-0.953, -0.0292)   |
| hsa-miR-515-5p_st2 | 0.0381               | (-0.56, -0.0166)    |
| hsa-miR-498_st2    | 0.0384               | (0.00411, 0.141)    |
| hsa-miR-125b_st2   | 0.0429               | (-0.158, -0.00268)  |

\*miRNAs are listed based significance (p-value <.05)

**Supplemental Table 2**  
**Differentially expressed miRNA's separated by race**

| <b>Gene</b>        | <b>(adjusted) p-value ↑</b> | <b>confidence interval</b> |
|--------------------|-----------------------------|----------------------------|
| hsa-miR-363_st1    | 3.43e-05                    | (0.83, 2.01)               |
| hsa-miR-132_st2    | 0.000354                    | (0.232, 0.678)             |
| hsa-miR-376b_st2   | 0.00188                     | (0.254, 1)                 |
| hsa-miR-410_st2    | 0.00291                     | (0.268, 1.18)              |
| hsa-miR-152_st2    | 0.00471                     | (0.116, 0.552)             |
| hsa-miR-189_st2    | 0.00498                     | (0.448, 2.17)              |
| hsa-miR110_st2     | 0.00514                     | (0.168, 0.863)             |
| hsa-miR-27b_st2    | 0.00657                     | (0.0455, 0.244)            |
| hsa-miR-519c_st2   | 0.0071                      | (-0.635, -0.115)           |
| hsa-miR-520h_st2   | 0.00774                     | (-0.684, -0.115)           |
| hsa-miR-27a_st1    | 0.00837                     | (0.0425, 0.245)            |
| hsa-miR-382_st2    | 0.00918                     | (0.106, 0.681)             |
| hsa-miR-574_st2    | 0.0135                      | (0.0633, 0.498)            |
| hsa-miR199_st2     | 0.0136                      | (0.0928, 0.745)            |
| hsa-miR-363-_st2   | 0.0136                      | (0.0939, 0.746)            |
| hsa-miR247_st1     | 0.0144                      | (0.0892, 0.743)            |
| hsa-miR-516-5p_st2 | 0.0154                      | (0.0931, 0.807)            |
| hsa-miR-210_st2    | 0.0156                      | (0.0293, 0.258)            |
| hsa-miR-654_st2    | 0.0161                      | (0.0305, 0.27)             |
| hsa-miR155_st2     | 0.0164                      | (-0.373, -0.0405)          |
| hsa-miR-499_st2    | 0.0175                      | (0.0732, 0.697)            |
| hsa-miR-20a_st1    | 0.0208                      | (0.0144, 0.161)            |
| hsa-miR-502_st2    | 0.0211                      | (-1, -0.0877)              |
| hsa-miR-24_st2     | 0.0214                      | (0.0176, 0.191)            |
| hsa-miR-631_st2    | 0.0223                      | (-1.48, -0.131)            |
| hsa-miR-376a_st1   | 0.0233                      | (0.0712, 0.905)            |
| hsa-miR-204_st1    | 0.0236                      | (0.2, 2.45)                |
| hsa-miR109_st1     | 0.0237                      | (0.034, 0.44)              |
| hsa-miR-638_st1    | 0.024                       | (-0.0507, -0.00384)        |
| hsa-miR-199b_st1   | 0.0242                      | (0.0853, 1.14)             |
| hsa-miR-199a-_st2  | 0.0247                      | (0.0608, 0.832)            |
| hsa-miR-375_st2    | 0.0261                      | (0.0385, 0.569)            |
| hsa-miR-7_st2      | 0.027                       | (0.0205, 0.317)            |
| hsa-miR-520g_st2   | 0.0326                      | (0.0348, 0.743)            |
| hsa-miR186_st2     | 0.0326                      | (0.0664, 1.35)             |
| hsa-miR-495_st2    | 0.0336                      | (0.0453, 1.05)             |
| hsa-miR197_st1     | 0.0356                      | (-0.621, -0.0237)          |
| hsa-miR-17-5p_st2  | 0.0358                      | (0.00594, 0.16)            |
| hsa-miR-154-_st1   | 0.0385                      | (0.0315, 1.08)             |
| hsa-miR-20b_st1    | 0.0402                      | (0.00538, 0.215)           |
| hsa-miR-335_st2    | 0.0405                      | (0.0129, 0.534)            |
| hsa-miR-379_st2    | 0.0416                      | (0.00758, 0.367)           |
| hsa-miR-365_st2    | 0.0462                      | (0.00507, 0.547)           |
| hsa-miR-138_st2    | 0.0466                      | (0.00786, 0.956)           |
| hsa-miR234_st1     | 0.0468                      | (0.0031, 0.412)            |
| hsa-miR-17-3p_st2  | 0.049                       | (0.000892, 0.392)          |
| hsa-miR236_st2     | 0.0497                      | (0.000796, 1.05)           |

\*miRNAs are listed based significance (p-value <.05)

Supplemental Table 3:

| AA tumors | mir152.est   | mir152.pval | Delta-CT.est | Delta-CT.pval |
|-----------|--------------|-------------|--------------|---------------|
| 447A      | -0.696637155 | 0.8686926   | -22.0931862  | 0.015334445   |
| 483A      | -0.57242203  | 0.487776836 | -28.03782204 | 0.000135695   |
| 472A      | 1.230001455  | 0.114486832 | -30.00683943 | 6.62E-05      |
| 587A      | -1.077526095 | 0.8686926   | -23.62551008 | 0.040558692   |
| 629A      | 0.866304395  | 0.373950868 | -28.72112884 | 0.000179342   |
| 759A      | 5.28520203   | 0.060393725 | -32.32330613 | 0.000772557   |
| 847A      | 3.95562363   | 0.337042166 | -32.99103206 | 0.003786121   |
| 849A      | 5.42199135   | 0.002691448 | -31.9771752  | 6.62E-05      |
| 806A      | 4.350014685  | 0.015947428 | -32.48747069 | 0.000135695   |
| 908A      | 2.42042828   | 0.009636856 | -30.89394584 | 6.62E-05      |
| 965A      | 2.718897825  | 0.0154044   | -28.36012012 | 6.62E-05      |
| 687A      | 3.251464845  | 0.009636856 | -28.81113801 | 6.62E-05      |
| 694A      | 3.20696258   | 0.001446297 | -28.71584134 | 6.55E-05      |
| 721A      | 4.00127125   | 0.141128671 | -30.13029319 | 0.001325822   |
| 729A      | 2.53715801   | 0.111097062 | -29.78596537 | 0.000333294   |
| 285A      | 10.43512345  | 0.0001899   | -30.71976138 | 6.62E-05      |
| 772A      | 10.31064225  | 0.001368501 | -35.39410426 | 8.01E-05      |
| 757A      | 3.025343885  | 0.502017589 | -31.79547242 | 0.006206846   |
| 779A      | 3.06494426   | 0.015334445 | -34.18088515 | 6.62E-05      |
| 814A      | 4.10736084   | 0.007931643 | -31.21567727 | 6.62E-05      |

| CA tumors | mir152.est  | mir152.pval | Delta-CT.est | Delta-CT.pval |
|-----------|-------------|-------------|--------------|---------------|
| 518A      | 3.1660223   | 0.517993809 | -28.34846599 | 0.010200113   |
| 490A      | -1.46173382 | 0.628240593 | -26.993535   | 0.003581743   |
| 507A      | -2.60991573 | 0.713087061 | -21.70785487 | 0.049214098   |
| 488A      | 4.632666585 | 0.002691448 | -27.54621136 | 6.62E-05      |
| 507A-1    | 6.871603965 | 0.034732857 | -27.81106009 | 0.001159988   |
| 813A      | 5.1664238   | 0.061944994 | -27.44717286 | 0.001159988   |
| 901A      | 4.70358086  | 0.015289551 | -27.93118704 | 0.0001899     |
| 864A      | 3.402314185 | 0.218540911 | -30.2919182  | 0.001459755   |
| 903A      | 2.30910969  | 0.015334445 | -27.24890009 | 6.62E-05      |
| 815A      | 5.052025795 | 0.045301397 | -27.14304922 | 0.000772557   |
| 842A      | 2.75108528  | 0.011761575 | -26.29559552 | 6.62E-05      |
| 843A      | 2.506352425 | 0.141128671 | -27.09723707 | 0.000596418   |
| 698A      | 2.86456489  | 0.119860556 | -26.50742046 | 0.000657323   |
| 835A      | 9.314155575 | 0.009636856 | -28.52375887 | 0.000635486   |
| 837A      | 2.84062481  | 0.092924462 | -27.3514618  | 0.00044229    |
| 895A      | 3.14495182  | 0.015334445 | -26.33824632 | 9.98E-05      |
| 891A      | 5.56247425  | 0.060393725 | -26.36350671 | 0.001368501   |

Supplemental Table 4:

| Characteristics of African American and Caucasian Primary Tumor Cells |     |      |            |                    |             |               |
|-----------------------------------------------------------------------|-----|------|------------|--------------------|-------------|---------------|
| Cells                                                                 | Age | Race | Morphology | Pathological Stage | Tumor Grade | Gleason Score |
| RC-30T                                                                | 65  | AA   | Epithelial | 7                  | T3a         | Moderate      |
| RC-33T                                                                | 56  | AA   | Epithelial | 6                  | T2c         | Moderate      |
| RC-108T                                                               | 70  | AA   | Epithelial | 6                  | T2c         | Well          |
| RC-136T                                                               | 67  | AA   | Epithelial | 8                  | T2b         | Poor          |
| RC-139T                                                               | 62  | AA   | Epithelial | 9                  | T3c         | Poor          |
|                                                                       |     |      |            |                    |             |               |
| RC-28T                                                                | 55  | CA   | Epithelial | 9                  | T3c         | Poor          |
| RC-143T                                                               | 64  | CA   | Epithelial | 8                  | T2b         | Well          |
| RC-145T                                                               | 68  | CA   | Epithelial | 7                  | T3b         | Moderate      |
| RC-205T                                                               | 70  | CA   | Epithelial | 8                  | T2b         | Poor          |

| <b>Gene</b> | <b>Forward Primer</b>   | <b>Reverse Primer</b>    |
|-------------|-------------------------|--------------------------|
| GAPDH       | TGCACCACCAACTGCTTAGC    | GGCATGGACTGTGGTCATGAG    |
| SOS1        | CGAGCCCTTTTCACTCAAGCAA  | CAGGAGGAGGGACAGGCACTTC   |
| Rictor      | GGAAGCCTGTTGATGGTGAT    | GGCAGCCTGTTTTATGGTGT     |
| E2F1        | AGATGGTTATGGTGATCAAAGCC | ATCTGAAAGTTCTCCGAAGAGTCC |
| DNMT1       | GTGGGGGACTGTGTCTCTGT    | TGAAAGCTGCATGTCCTCAC     |
| ABCD3       | CTCGGCCTGCACGGTAAGAA    | TGGCAGCGATGAAGTTGAGTAAGT |

Supplemental Table 5:

|       |                        |                          |
|-------|------------------------|--------------------------|
| TGFB  | AGAGTGCCTGAACAACGGATT  | CCATTTCGCCTTCTGCTCTT     |
| SOX2  | AACCAAGACGCTCATGAAGAAG | CTGCGAGTAGGACATGCTGTAG   |
| SMAD4 | GCTGCTGGAATTGGTGTGATG  | AGGTGTTTCTTTGATGCTCTGTCT |

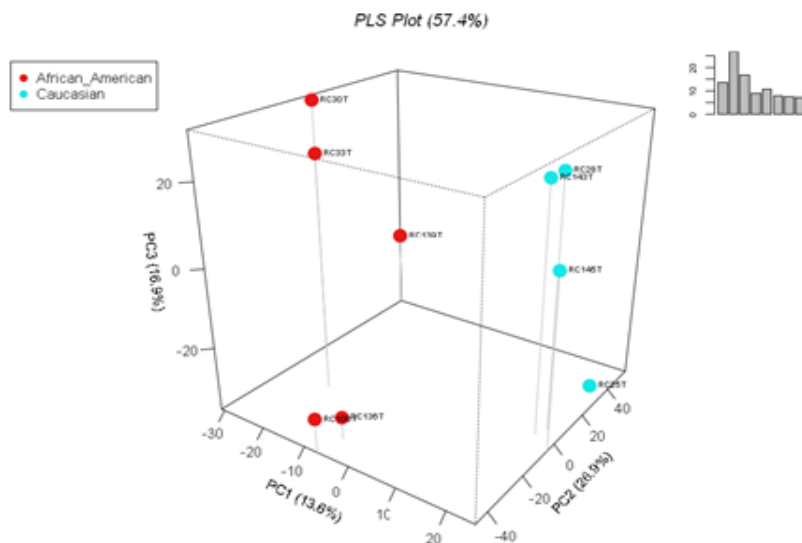

Supplemental Fig 1: **Race related miRNAs separate primary tumors cells by race.** (a) Race related miRNAs observed from the AA prostate cell lines were probed in a panel of non-immortalized AA and CA PCa cells isolated from primary tumors. PLS plot of individual primary prostate cancer cells shows distinct separation of AA and CA patients based on AA related miRNA expression.

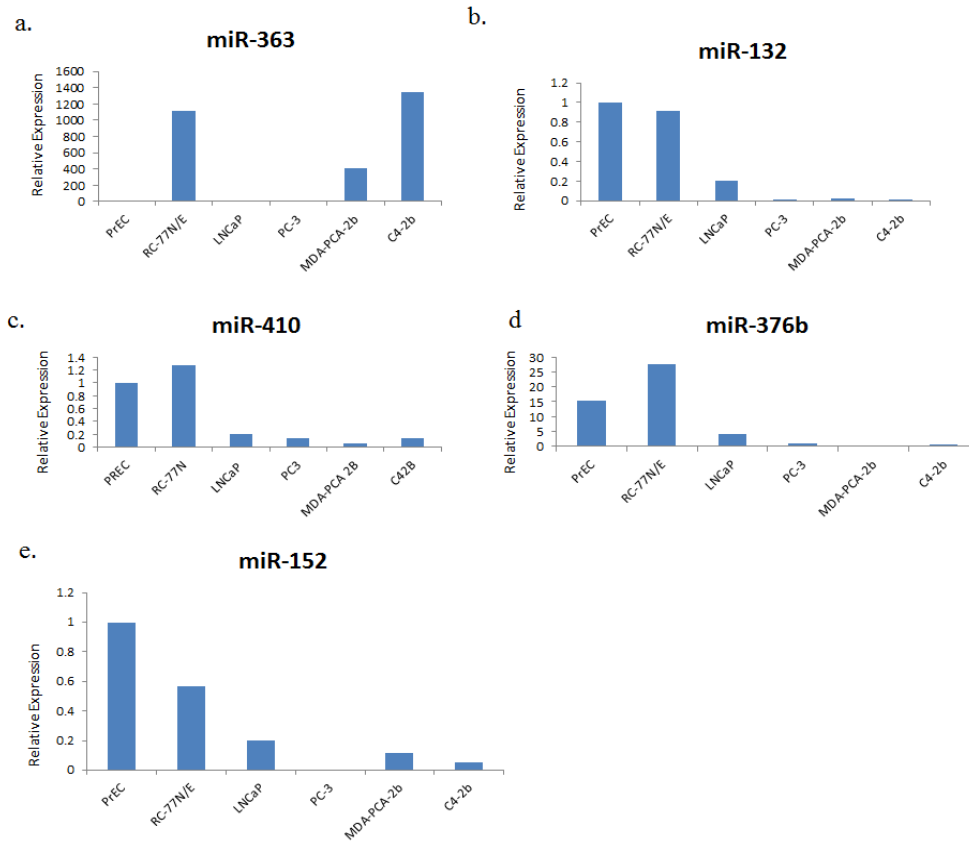

Supplemental Fig 2. **qRT-PCR validation of miRNA differentially expressed miRNA in PCa cell lines.** (a-e) Relative miRNA expression of 5 most significantly differentially expressed miRNAs were determined by qRT-PCR in prostate cancer cell lines with increasing aggressiveness, compared to normal CA PrEC and AA RC-77N/E cells. For all qRT-PCR experiments, expression was normalized to RNU48 (miRNA) control.

Location of significant microRNAs CpG Island

| MicroRNA | Chromosome Location | CpG Length (bp) |
|----------|---------------------|-----------------|
| miR-152  | 17q21.32            | 389, 203        |
| miR-410  | 14q32.31            | 323             |
| miR-376b | 14q32.31            | NA              |
| miR-132  | 17p13.3             | 869             |

miR-152

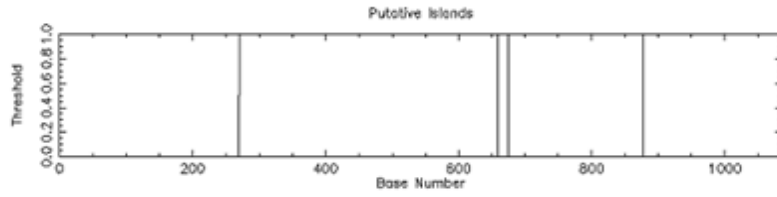

miR-410

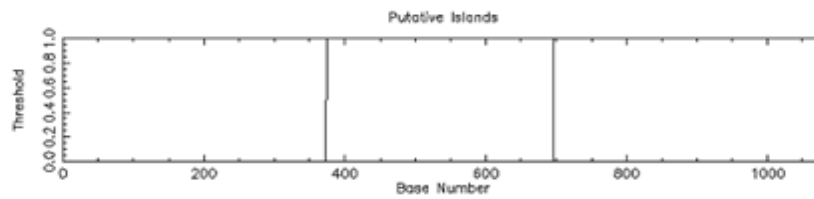

miR-376b

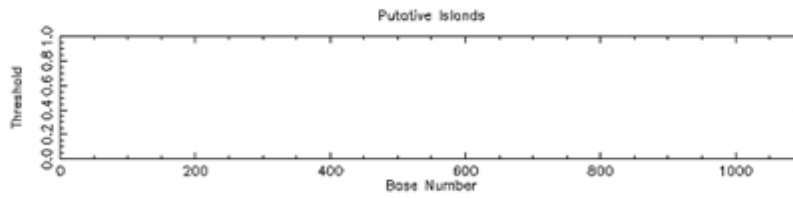

miR-132

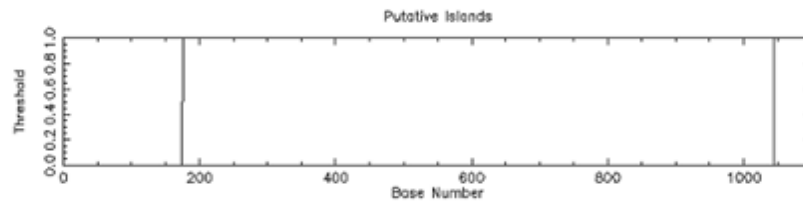

Supplemental Fig 3: *In silico* analysis of CpG islands of race related miRNAs. (a). Schematic map of the CpG islands in the promoter region of miR-152, miR-410, miR-376, miR-132.



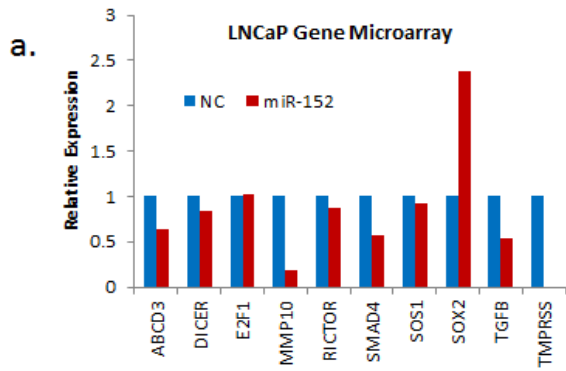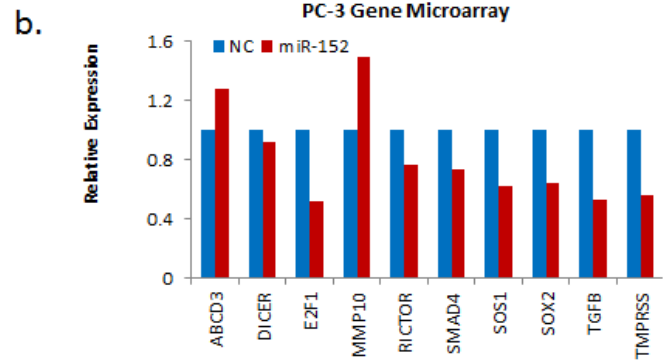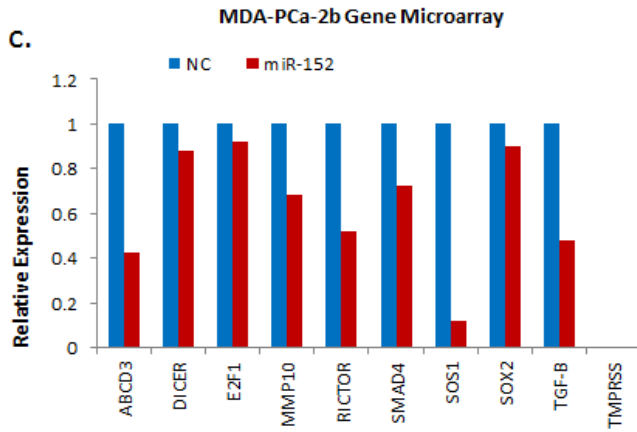

Supplemental Fig. 4: **Validation of additional miR-152 target genes** (a) qRT-PCR validation of the custom-designed miRNA microarray for algorithm-predicted miR-152 target genes (TargetScan) with or without pre-miR-152 treatment in LNCaP, PC-3, and MDA-PCa-2b cells. For all qRT-PCR experiments, expression was normalized to GAPDH (mRNA) control.
